# Supplementary material for: Enlarged dendritic spines and pronounced neophobia in mice lacking the PSD protein RICH2
Source: Springer Nature journal article supplement (doi:10.1186/s13041-016-0206-6), 2016-03-11
Supplement: MOESM5 [file 25663180]

|                              |                                                                                                         | Rich+/+          | Rich+/-          | Rich-/-      |                                                                   |
|------------------------------|---------------------------------------------------------------------------------------------------------|------------------|------------------|--------------|-------------------------------------------------------------------|
| number of animal (male mice) |                                                                                                         | (n=10)           | (n=12)           | (n=9)        | <b>p-value</b>                                                    |
| weight [g]                   |                                                                                                         | 26.27<br>(±0.74) | 27.06<br>(±0.76) | 27.41 (±0.8) | one way ANOVA ( $F_{2,28} = 1.265$ , $p = 0.298$ )                |
| Body position                | (0 = inactive, 1 = active, 2 = excessive active)                                                        | 0.55 (±0.16)     | 0.45 (±0.16)     | 0.45 (±0.16) | one way ANOVA ( $F_{2,28} = 0.082$ , $p = 0.921$ )                |
| Tremor                       | (0 = absent, 1 = present)                                                                               | 0                | 0                | 0            | n.s.                                                              |
| Palpebral closure            | (0 = eyes open, 1 = eyes closed)                                                                        | 0                | 0                | 0            | n.s.                                                              |
| Coat appearance              | (0 = tidy and well groomed coat, 1 = irregularities such as piloerection)                               | 0                | 0                | 0            | n.s.                                                              |
| Whiskers                     | (0 = present, 1 = absent)                                                                               | 0                | 0                | 0            | n.s.                                                              |
| Defecation                   | (0 = present, 1 = absent)                                                                               | 0.1 (±0.12)      | 0.1 (±0.14)      | 0.27 (±0.13) | one way ANOVA ( $F_{2,28} = 0.516$ , $p = 0.602$ )                |
| Transfer arousal             | (0 = extended freeze (over 5 seconds), 1 = briefly freeze followed by movement, 2 = immediate movement) | 0.89 (±0.26)     | 0.76 (±0.23)     | 0.81 (±0.26) | one way ANOVA ( $F_{2,28} = 0.075$ , $p = 0.928$ )                |
| Locomotor activity           | (total number of squares crossed (within 30 sec.))                                                      | 19.2 (±1.46)     | 18.6 (±2.28)     | 17.2 (±3.27) | one way ANOVA ( $F_{2,28} = 0.413$ , $p = 0.666$ )                |
| Gait                         | (0 = fluid movement (3 mm pelvic elevation), 1 = lack of fluid movement (> 3 mm pelvic elevation))      | 0                | 0                | 0            | n.s.                                                              |
| Tail elevation               | (0 = horizontal extension, 1 = dragging, 2 = elevated/straub tail)                                      | 0                | 0                | 0            | n.s.                                                              |
| Startle response             | (0 = none, 1 = preyer reflex, 2 = reaction in addition to preyer reflex)                                | 1.1 (±0.12)      | 1.12 (±0.15)     | 1.13 (±0.16) | one way ANOVA ( $F_{2,28} = 2.149$ , $p = 0.135$ )                |
| Touch escape                 | (0 = no response, 1 response to touch, 2 = flees prior to touch)                                        | 1 (±0.26)        | 1 (±0.31)        | 1.1 (±0.17)  | one way ANOVA ( $F_{2,28} = 0.124$ , $p = 0.884$ )                |
| Grip strength forepaw        |                                                                                                         | 3.45 (±0.23)     | 3.38 (±0.15)     | 3.07 (±0.16) | Kruskal Wallis ANOVA (chi-square: 1.216, $df = 2$ , $p = 0.526$ ) |
| Grip strength all paw        |                                                                                                         | 6.38 (±0.35)     | 6.31 (±0.26)     | 5.78 (±0.26) | one way ANOVA ( $F_{2,28} = 1.216$ , $p = 0.311$ )                |
| Positional passivity         | (0 = struggles when held by tail, 1 = no struggle)                                                      | 0                | 0                | 0            | n.s.                                                              |
| Skin color                   | (0 = blanched, 1= pink, 2 = birght, deep red)                                                           | 0.5              | 0.5              | 0.5          | n.s.                                                              |
| Trunk curl                   | (0 = present, 1 = absent)                                                                               | 0                | 0                | 0            | n.s.                                                              |
| Limb grasping                | (0 = absent, 1 = present)                                                                               | 0                | 0                | 0            | n.s.                                                              |
| Pinna refelx                 | (0 = present, 1 = absent)                                                                               | 0                | 0                | 0            | n.s.                                                              |
| Corneal reflex               | (0 = present, 1 = absent)                                                                               | 0                | 0                | 0            | n.s.                                                              |
| Contact righting reflex      | (0 = present, 1 = absent)                                                                               | 0                | 0                | 0            | n.s.                                                              |
| Evidence of biting           | (0 = none, 1 = biting in response to handling, 2 = excessive activity)                                  | 0                | 0                | 0            | n.s.                                                              |
| Vocalization                 | (0 = none, 1 = vocal)                                                                                   | 0.21 (±0.11)     | 0.31 (±0.16)     | 0.24 (±0.13) | one way ANOVA ( $F_{2,28} = 0.2.72$ , $p = 0.764$ )               |
